1 **Unlocking inaccessible historical genomes preserved in formalin**

2

3 Erin E. Hahn<sup>1</sup>, Marina R. Alexander<sup>1</sup>, Alicia Grealy<sup>1</sup>, Jiri Stiller<sup>2</sup>, Donald M. Gardiner<sup>2</sup> and

4 Clare E. Holleley<sup>1\*</sup>

5

6 Institutional Addresses:

7 <sup>1</sup> National Research Collections Australia, Commonwealth Scientific Industrial Research

8 Organisation, Canberra, ACT 2601, Australia

9 <sup>2</sup> Agriculture and Food, Commonwealth Scientific Industrial Research Organisation, St Lucia,

10 Queensland 4067, Australia

11

12 Email addresses:

13 EEH – [erin.hahn@csiro.au](mailto:erin.hahn@csiro.au); MRA – [marina.alexander@csiro.au](mailto:marina.alexander@csiro.au); AG –

14 [Alicia.grealy@csiro.au](mailto:Alicia.grealy@csiro.au); JS – [jiri.stiller@csiro.au](mailto:jiri.stiller@csiro.au); DMG – [Donald.gardiner@csiro.au](mailto:Donald.gardiner@csiro.au); CEH –

15 [clare.holleley@csiro.au](mailto:clare.holleley@csiro.au)\*

16 \* Corresponding author

## 17 **Abstract**

## 18 **Background**

19 Museum specimens represent an unparalleled record of historical genomic data. However, the  
20 wide-spread practice of formalin preservation has thus far impeded genomic analysis of a large  
21 proportion of specimens. Limited DNA sequencing from formalin-preserved specimens has  
22 yielded low genomic coverage with unpredictable success. We set out to refine sample  
23 processing methods and to identify specimen characteristics predictive of sequencing success.  
24 With a set of taxonomically diverse specimens collected between 1936 and 2015 and ranging  
25 in preservation quality, we compared the efficacy of several end-to-end whole genome  
26 sequencing workflows alongside a k-mer-based trimming-free read alignment approach to  
27 maximize mapping of endogenous sequence.

## 28 **Results**

29 We recovered complete mitochondrial genomes and up to 3X nuclear genome coverage from  
30 formalin-fixed tissues. Hot alkaline lysis coupled with phenol-chloroform extraction out-  
31 performed proteinase K digestion in recovering DNA, while library preparation method had  
32 little impact on sequencing success. The strongest predictor of DNA yield was overall  
33 specimen condition, which additively interacts with preservation conditions to accelerate DNA  
34 degradation.

## 35 **Conclusions**

36 We demonstrate a significant advance in capability beyond limited recovery of a small number  
37 of loci via PCR or target-capture sequencing. To facilitate strategic selection of suitable  
38 specimens for genomic sequencing, we present a decision-making framework that utilizes  
39 independent and non-destructive assessment criteria. Sequencing of formalin-fixed specimens  
40 will contribute to a greater understanding of temporal trends in genetic adaptation, including  
41 those associated with a changing climate. Our work enhances the value of museum collections

42 worldwide by unlocking genomes of specimens that have been disregarded as a valid molecular  
43 resource.

44

45 **Keywords:** DNA, formaldehyde, formalin-fixed, genome, hot alkali, museum, museomics,  
46 preservation media

## 47 **Background**

48 Natural history collections are a window into the recent past, offering a view of historical  
49 biodiversity that is unparalleled in its detail. Collected over the last 250 years, voucher  
50 specimens document a period of time over which humans have had a devastating impact on the  
51 natural world (1). The comprehensive metadata associated with each specimen (collection date,  
52 location, sex, weight, age, etc.), phenotypic data (e.g., color, size, gut contents) and genomic  
53 data can be used to monitor ecosystem health and study the mechanisms driving adaptation,  
54 evolution, speciation and extinction (2,3). The value of collections as sources of historical  
55 genetic material has been recognized for the past 30 years, with numerous pathways emerging  
56 to retrieve high-quality DNA from challenging archival vertebrate tissues such as skins (4),  
57 feathers (5,6), eggshells (7,8) and toe pads (9).

58 DNA degradation associated with preservation method and aging has limited most genetic  
59 studies of museum specimens to interrogation of relatively few loci via PCR amplification,  
60 often targeting the high copy mitochondrial genome. For phylogenetic studies where a survey  
61 of many-fold more loci improves understanding of species' evolutionary history (10–12),  
62 genome-wide analyses are increasingly becoming common place. With demand for historical  
63 genome-wide data on the rise, newly-developed target-capture approaches now facilitate  
64 broader genomic survey from degraded museum specimens (13–15). In some cases, recovery  
65 and assembly of whole historical genomes has been achieved (16,17), including, extinct from  
66 species (e.g., the Tasmanian tiger (18)). While technological advances are enabling recovery  
67 of genomic data from many museum specimens, genomic study of those preserved with 10%  
68 formalin (3.4% w/v formaldehyde) has thus far been very limited.

69 Formalin-fixation, followed by storage in ethanol, is a common curatorial method used to  
70 preserve soft tissue structure. Of the 1.9 million records of preserved chordates within the open-

71 access Atlas of Living Australia (ALA) specimen database (19), 33% are classified as “spirit-  
72 preserved” (preserved in ethanol with or without prior formalin-fixation). A search for  
73 “formalin” preparation within the ALA’s chordate records indicates at least 4% of specimens  
74 (N = 77,301) have been formalin-fixed. This is likely a severe underestimate because formalin-  
75 fixation is not consistently recorded by all collections. Notably, for fish, reptiles and  
76 amphibians, formalin-fixation has historically been the primary method used to preserve tissues  
77 long-term while mammals and birds are commonly dry-preserved. Most collections now  
78 archive frozen fresh tissue specifically as a genomic resource. However, prior to the 1980s,  
79 spirit-preservation was the only method used to preserve soft tissue. Thus, spirit collections  
80 offer the only opportunity to obtain genetic data from a large proportion of older specimens,  
81 holotypes and some of the world’s most biodiverse vertebrate taxonomic groups.

82 Genomic study of formalin-preserved museum specimens has lagged behind because DNA  
83 extracted from such tissues is typically low-yield and highly fragmented. PCR amplification of  
84 formalin-degraded DNA templates is generally restricted to few, short genomic loci, which  
85 provide limited phylogenetic resolution (20). Formalin fixation presents further challenges by  
86 inducing numerous molecular lesions, such as strand breaks, base misincorporation, and both  
87 intra- and intermolecular cross-links (21–23). Formaldehyde damage to DNA templates can  
88 result in sequencing artefacts that are difficult to differentiate from true genetic variants  
89 (22,23). Because PCR amplification of damaged DNA is particularly prone to sequencing  
90 artefacts, it is preferable to perform deep next-generation sequencing of amplicons (20) or to  
91 avoid amplicon approaches altogether through whole genome sequencing (WGS) of degraded  
92 templates (24). Coupled with library preparation methods optimized for low-input and  
93 damaged DNA templates (25,26), high-throughput sequencing can generate enough coverage  
94 to call genomic variants with high confidence (27). Thus, WGS and reduced representations of

95 genomes could provide a way to overcome the challenges associated with formalin damage  
96 and accurately reconstruct historical genetic variation from formalin-preserved tissues.

97 Promisingly, WGS of formalin-fixed paraffin-embedded (FFPE) archival tissues has become  
98 routine in clinical and medical contexts (28). However, museum specimens are often older,  
99 exposed to higher concentrations of formaldehyde, incubated in the fixative for longer (29) and  
100 in most cases have not been preserved in ideal conditions. Common museum practices, such  
101 as failure to rinse specimens prior to permanent storage in ethanol, result in prolonged  
102 formaldehyde exposure (30). Indeed, many specimens can be in contact with formaldehyde (or  
103 its derivatives, such as formic acid) for the entirety of their tenure in a collection. Prolonged  
104 formaldehyde exposure, especially under acidic conditions, is thought to result in more extreme  
105 DNA degradation (20,31). The damage resulting from the preservation process compounds  
106 with DNA damage due to natural decomposition, which can be extensive and often precedes  
107 any obvious visual indicators of decomposition (32). Unfortunately, the time between death  
108 and preservation (post-mortem interval) is highly variable and rarely recorded. In light of these  
109 additional challenges, WGS methods used with FFPE tissues are relevant but not directly  
110 transferable to formalin-fixed museum tissues.

111 Of the few genetic studies of formalin-fixed museum specimens, most have targeted nuclear  
112 (33–37) and high copy mitochondrial (20,38,39) loci via PCR amplification due to the  
113 difficulty and unpredictability of nuclear DNA extraction. There are few examples of broader-  
114 scale genomic sequencing of formalin-fixed museum specimens and none have recovered  
115 whole vertebrate genomes. Hot alkaline extraction followed by WGS of a single 30-year-old  
116 formalin-preserved *Anolis* lizard yielded sufficient coverage to reconstruct the entire  
117 mitochondrial genome (40). Using the same method, whole genomes were recovered for the  
118 bioluminescent bacterial symbionts contained within light organs of formalin-preserved  
119 cardinalfish (41). Using a proteinase K digestion method, sufficient gDNA was recovered for

120 capture and sequencing of ultra-conserved elements from formalin-preserved snakes (42).  
121 Hybridization capture baits have also been used to recover the mitochondrial genome from a  
122 120-year-old formalin-preserved Crimean green lizard (43). Highlighting the difficulty of  
123 recovering gDNA from formalin-preserved specimens, numerous studies have reported failure  
124 to extract and amplify gDNA from formalin-preserved museum tissues (20,44,45). In this  
125 context, it is unfortunate yet wise to be hesitant to conduct destructive sampling of formalin-  
126 preserved specimens for the purposes of costly WGS.

127 Recent reports of successful, albeit limited, genomic sequencing in formalin-preserved  
128 specimens indicate WGS of higher quality specimens is possible. However, without a  
129 framework to guide specimen selection, genomic work on formalin-preserved museum tissues  
130 will remain infeasible. It is likely impossible to fully know the numerous and interdependent  
131 factors driving sequencing success (e.g., age of the specimen (46,47), method of preservation  
132 (48), post-mortem interval (32) and heat and light exposure during storage). However,  
133 identification of metrics with which to pre-screen specimens for sequencing suitability will  
134 improve yield of genomic data while reducing unnecessary destruction of specimens. With  
135 screening criteria in hand, museum curators will be less reluctant to grant destructive sampling  
136 (49) and researchers will be more inclined to include historical specimens in their analyses.

137 To facilitate informed-selection of formalin-preserved museum specimens for WGS, we set  
138 out to further refine appropriate extraction and library preparation methods and to identify  
139 specimen characteristics predictive of DNA extraction and sequencing success. First, we  
140 investigated the relationship between residual formaldehyde concentration and pH in  
141 preservation media through a survey of specimens in the Australian National Wildlife  
142 Collection (ANWC; Crace, Australia). Next, in a phased approach, we compared DNA yield  
143 achieved with three extraction methods - (1) hot alkaline lysis digestion followed by phenol-  
144 chloroform extraction, (2) proteinase K digestion followed by phenol-chloroform extraction

145 and (3) proteinase K digestion followed by silica spin column purification. We then applied  
146 the best-performing DNA extraction method to terrestrial vertebrate specimens representing  
147 the broad range of tissue quality observed in museum specimens and tested performance of two  
148 library preparation methods – (1) single-stranded method v2.0 (ss2) (25) and (2) BEST double-  
149 stranded method (dsBEST) (26). Placing our results into context with a comprehensive and  
150 unbiased survey of collection-wide spirit preservation conditions, we present a decision-  
151 making framework to accelerate and facilitate genomic research using formalin-preserved  
152 specimens.

153

## 154 **Results**

### 155 **Preservation media condition survey**

156 Within 149 ANWC specimen jars surveyed (23 amphibian, 40 mammal, 40 reptile, and 46  
157 avian), preservation media pH ranged from 4.8–8.4 with 70 (47%), 61 (41%) and 18 (12%)  
158 having neutral (6.5–7.5), low (< 6.5) and high (> 7.5) pH, respectively. Residual formaldehyde  
159 concentration ([F]) ranged from 0–40,000 mg/L. High [F] (> 1000 mg/L) was detected in 61%  
160 of low pH jars, 6% of neutral pH jars and 0% of high pH jars. We assumed specimens in jars  
161 yielding [F] = 0 (n = 82) were preserved with ethanol and without exposure to formaldehyde.  
162 Consistent with the practice of fixing specimens with unbuffered formalin combined with the  
163 gradual degeneration of formaldehyde to formic acid, the pH of the formalin-preserved samples  
164 (range 4.8–7.1; mean = 6.2) was significantly lower than for the ethanol-preserved samples  
165 (range 6.1–8.4; mean = 7.1) (T-test;  $p < 0.0001$ ; Supplementary Figure 1A). The recorded  
166 collection date of the specimens ranged from 1936–2015. The time since collection (age) of  
167 the ethanol-preserved specimens (mean = 40.1 years) was not significantly different than the  
168 formalin-preserved specimens (mean = 36.1 years) (Supplementary Figure 1B). Among the



169 formalin-preserved samples, [F] and pH were negatively correlated ( $R = -0.6$ ,  $p < 0.001$ ; Figure  
 170 1). Age was not significantly correlated with either [F] or pH. Of the 12 specimens selected for  
 171 sequencing, collection date ranged from 1962–2006 and pH ranged from 4.9–8.2. Three  
 172 sequenced specimens were ethanol-preserved and nine sequenced specimens were formalin-  
 173 preserved with [F] ranging from 325–20,000 mg/L (Table 1).

174

175 **Table 1. Specimen metadata and independently assessed preservation quality metrics**  
 176 **for samples selected for sequencing**

177 Twelve specimens (three ethanol-preserved and nine formalin-preserved) from the ANWC  
 178 spirit vault were selected for DNA extraction and sequencing. Unique ANWC specimen IDs,  
 179 species names, common name, recorded year of collection, residual formaldehyde  
 180 concentration in the preservation media (mg/L), pH and tissue sampled for extraction are  
 181 given.

| Preservation | Specimen ID | Species name                    | Common name           | Collection year | [F] (mg/L) | pH   | Tissue sampled |
|--------------|-------------|---------------------------------|-----------------------|-----------------|------------|------|----------------|
| Ethanol      | ANWC B30438 | <i>Phalacrocorax carbo</i>      | Great black cormorant | 1977            | 0          | 8.2  | Skin           |
|              | ANWC B00001 | <i>Aquila audax</i>             | Wedge-tailed eagle    | 1973            | 0          | 7.68 | Liver          |
|              | ANWC M15492 | <i>Phascolarctos cinereus</i>   | Koala                 | 1971            | 0          | 7    | Muscle         |
| Formalin     | ANWC A02522 | <i>Rhinella marina</i>          | Cane toad             | 2002            | 2050       | 6.41 | Liver          |
|              | ANWC M11465 | <i>Macropus eugenii</i>         | Tammar wallaby        | 1989            | 8000       | 5.26 | Liver          |
|              | ANWC R03280 | <i>Crocodylus porosus</i>       | Saltwater crocodile   | 1973            | 4000       | 6.31 | Liver          |
|              | ANWC B47838 | <i>Melopsittacus undulatus</i>  | Budgerigar            | 1996            | 5000       | 6.3  | Liver          |
|              | ANWC R06312 | <i>Pogona minima</i>            | Dwarf dragon          | 1986            | 1800       | 7.04 | Liver          |
|              | ANWC R01545 | <i>Pogona vitticeps</i>         | Central dragon        | 1971            | 325        | 6.24 | Liver          |
|              | ANWC B40690 | <i>Taeniopygia guttata</i>      | Zebra finch           | 1986            | 20000      | 4.86 | Muscle         |
|              | ANWC B34691 | <i>Falco cenchroides</i>        | Australian kestrel    | 2006            | 2000       | 5.45 | Liver          |
|              | ANWC M03973 | <i>Ornithorhynchus anatinus</i> | Platypus              | 1962            | 10000      | 5.79 | Muscle         |

182

### 183 DNA quantification

184 We compared DNA yield from the hot alkaline lysis (HA), proteinase K plus phenol-  
185 chloroform (proK-PC) and proteinase K plus column (proK-col) extraction methods for the  
186 *Rhinella marina*, *Macropus eugenii* and *Crocodylus porosus* specimens and observed no  
187 significant differences between extraction methods (one-way ANOVA; Supplemental Figure  
188 3A). However, the HA method produced more DNA from the two poor quality specimens (*M.*  
189 *eugenii* and *C. porosus*) compared to either of the proteinase K methods (Table 2). Thus, we  
190 predicted the HA method would perform better on specimens ranging broadly in preservation  
191 quality and we used this method to extract the remaining nine specimens. HA extraction yielded  
192 DNA detectable by high sensitivity Qubit for all twelve specimens. Two ethanol-preserved  
193 specimens (*Aquila audax* and *Phascolarctos cinereus*) and two formalin- preserved specimens  
194 (*R. marina* and *Melopsittacus undulatus*) yielded > 1,000 ng total DNA from 50 mg of tissue  
195 (Table 2). Three specimens, *Phalacrocorax carbo*, *Taeniopygia guttata* and *Ornithorhynchus*  
196 *anatinus*, yielded particularly low (< 100 ng) total DNA from 50 mg of tissue (Table 2). We  
197 observed no significant difference in DNA yield between ethanol and formalin-preserved  
198 specimens (T-test; Supplemental Figure 3B). However, mean DNA yield from ethanol-  
199 preserved specimens was more than double that from formalin-preserved specimens. Mean  
200 DNA yield from formalin-preserved specimens in preservation media with low pH (< 6) was  
201 not significantly different from those in media with neutral to high pH (> 6) (Supplemental  
202 Figure 3C). DNA yield was significantly higher from formalin-preserved liver tissue compared  
203 to non-liver tissue (T-test;  $p < 0.05$ ; Supplemental Figure 3D). Both [F] and age showed a  
204 negative but non-significant correlation with DNA yield from formalin-preserved specimens  
205 (Supplemental Figures 3E and 3F).

206 **Table 2. Sequencing and alignment statistics**

207 For all specimens, DNA yield is given for the individual extractions of 50 mg of tissue. For  
 208 the remaining metrics, the values shown were calculated having combined both the ss2 and  
 209 dsBEST libraries. The number of raw reads is given as a sum of all single reads (R1 and R2)  
 210 from the paired-end sequencing run. Reads aligned indicates the percent of raw reads aligned  
 211 to reference genome after removal of PCR and optical duplicates. The mean aligned insert  
 212 length is the mean length (in bp) of the aligned portion of the read.  $C_{nuc}$  is the coverage of the  
 213 nuclear genome.  $C_{mt}$  is the proportion of mitochondrial genome with greater than 30X  
 214 coverage.  $C_{pot}$  is the estimated potential genomic coverage if the full library had been  
 215 sequenced, calculated from the estimated library complexity. MRM is the number of reads  
 216 aligned to the mitochondrial genome per one million raw reads.

| Preservation                    | Species                       | Extraction method         | DNA yield from 50 mg (ng) | Raw reads (million) | Reads aligned (%) | Mean aligned insert length (bp) | $C_{nuc}$ | $C_{mt}$ | $C_{pot}$ | MRM   |    |
|---------------------------------|-------------------------------|---------------------------|---------------------------|---------------------|-------------------|---------------------------------|-----------|----------|-----------|-------|----|
|                                 | <i>Rhinella marina</i>        | HA                        | 1,860                     | 434                 | 21                | 65                              | 2.2       | 0.78     | 6.2       | 52    |    |
|                                 |                               | proK-col                  | 666                       | 77                  | 40                | 81                              | 1         | 0        | 6.2       | 14    |    |
|                                 |                               | proK-PC                   | 2,550                     | 321                 | 15                | 74                              | 1.2       | 0.42     | 11.4      | 29    |    |
|                                 | <i>Macropus eugenii</i>       | HA                        | 271                       | 306                 | 8                 | 56                              | 0.5       | 0.59     | 2.7       | 50    |    |
|                                 |                               | proK-col                  | 4                         | 17                  | 1                 | 67                              | 0         | 0        | 0.1       | 3     |    |
|                                 |                               | proK-PC                   | 33                        | 801                 | < 1               | 65                              | 0         | 0        | 0.1       | 2     |    |
|                                 | Formalin                      | <i>Crocodylus porosus</i> | HA                        | 130                 | 23                | < 1                             | 67        | 0        | 0         | 0     | 11 |
|                                 |                               |                           | proK-col                  | None detected       | 160               | < 1                             | 70        | 0        | 0         | 0.1   | 12 |
|                                 |                               |                           | proK-PC                   | 79                  | 294               | < 1                             | 62        | 0        | 0         | 0     | 2  |
| <i>Melopsittacus undulatus</i>  |                               | HA                        | 2,400                     | 318                 | 20                | 60                              | 3.1       | 0.94     | 23.6      | 201   |    |
| <i>Pogona minima</i>            |                               | HA                        | 521                       | 367                 | 7                 | 58                              | 0.8       | 0.51     | 7.5       | 29    |    |
| <i>Pogona vitticeps</i>         |                               | HA                        | 672                       | 432                 | 15                | 59                              | 2.1       | 0.85     | 7.9       | 52    |    |
| <i>Taeniopygia guttata</i>      |                               | HA                        | 15                        | 62                  | < 1               | 66                              | 0         | 0        | 0         | 1     |    |
| <i>Falco cenchroides</i>        |                               | HA                        | 690                       | 303                 | 5                 | 56                              | 0.7       | 0.12     | 2.1       | 14    |    |
| <i>Ornithorhynchus anatinus</i> |                               | HA                        | 22                        | 520                 | < 1               | 70                              | 0         | 0.13     | 0.8       | 20    |    |
|                                 | <i>Phalacrocorax carbo</i>    | HA                        | 57                        | 292                 | < 1               | 69                              | 0.10      | 0.90     | 0.60      | 50.00 |    |
| Ethanol                         | <i>Aquila audax</i>           | HA                        | 1,932                     | 282                 | 67                | 76                              | 11.3      | 0.98     | 323       | 2515  |    |
|                                 | <i>Phascolarctos cinereus</i> | HA                        | 1,254                     | 423                 | 60                | 76                              | 5.4       | 0.94     | 93        | 2606  |    |

## 217 **Pre-alignment library quality assessment**

218 Prior to alignment, we used FastQC to assess the quality of paired-end reads from ss2 and  
219 dsBEST libraries. All libraries contained a high proportion of adapter content and low read  
220 quality score beginning at roughly 50 bp, consistent with highly fragmented input DNA.  
221 Focusing on the first 75 bp of the raw reads, mean sequence quality was slightly but  
222 significantly higher for read 2 (mean Phred score = 34.3) than for read 1 (mean Phred score =  
223 33.7) across all libraries (paired T-test;  $p < 0.001$ ). Likewise, the mean sequence quality was  
224 significantly higher in ss2 libraries compared to the corresponding dsBEST libraries for both  
225 read 1 (mean of the differences = 2.1; paired T-test;  $p < 0.001$ ) and read 2 (mean of the  
226 differences = 0.79; paired T-test;  $p < 0.01$ ). Mean sequence quality was not significantly  
227 different between reads derived from ethanol and formalin-preserved tissues, even when  
228 excluding libraries prepared from less than 200 ng of input DNA (paired T-test). We found  
229 evidence of cross-contamination in several libraries prepared from low DNA yield extractions.  
230 Compared to negative controls, both *O. anatinus* libraries and all but two *C. porosus* libraries  
231 showed a higher number of reads classified as genus *Mus* by Kraken2 (Supplementary Table  
232 2). The *O. anatinus* libraries also contained a high percentage of reads classified as *Homo*  
233 *sapiens* (9.7% and 25%). The *O. anatinus* and *C. porosus* tissues were among those that yielded  
234 the least DNA. The *O. anatinus* HA extraction yielded just 22 ng. The *C. porosus* HA and  
235 proK-PC extractions yielded 130 and 79 ng, respectively, while the proK-col extraction yielded  
236 no detectable DNA. The only other specimens to yield less than 500 ng were the *P. carbo*, *T.*  
237 *guttata* and *M. eugenii*.

## 238 **Relative alignment quality from three extraction methods**

239 We used three indicators of alignment quality to compare the relative success of the three  
240 extraction methods on the *R. marina*, *M. eugenii* and *C. porosus* specimens: percent of raw  
241 reads aligned to the genome (% alignment), the number of reads aligned to the mitochondrial

242 genome per million raw reads (MRM) and the mean aligned insert length. Among these three  
243 specimens, we observed no significant differences between library preparation methods in any  
244 of the three alignment quality indicators (paired T-tests). Therefore, we took the mean of the  
245 two library preparations to compare extraction methods across each alignment quality  
246 indicator. Again, we observed no significant difference between the three extraction methods  
247 applied to the *R. marina*, *M. eugenii* and *C. porosus* specimens in any of the three alignment  
248 quality indicators (one-way ANOVA). All six *C. porosus* libraries yielded < 1% alignment  
249 (Figure 2A and Table 2), indicating failure of all extraction and library preparation methods on  
250 this specimen. Excluding the *C. porosus* libraries, we observed significant differences in MRM  
251 between the extraction methods (one-way ANOVA;  $p < 0.05$ ) with the HA method producing  
252 significantly more MRM than both the proK-col and proK-PC methods (Tukey tests;  $p < 0.05$ ).  
253 We observed no significant difference in MRM between the proK-col and proK-PC methods  
254 (Tukey tests) nor in % alignment or mean insert length between the three extraction methods  
255 (one-way ANOVA).

### 256 **Effect of specimen quality on sequencing success**

257 The percentage of aligned reads removed by optical and PCR de-duplication varied between  
258 8.8% and 99.5% across all libraries. Among the HA alignments, de-duplication reduced  
259 significantly more mapped reads from dsBEST libraries than from ss2 libraries (paired T-test;  
260  $p < 0.01$ ). Combining the ss2 and dsBEST libraries for each HA extraction, de-duplication  
261 removed more than double the percentage of reads (69.8% versus 32.8%) from poor quality  
262 specimens (those yielding < 1% reads aligned) compared to better quality specimens (those  
263 yielding > 1% reads aligned). However, this difference was not significant (T-test). De-  
264 duplication removed significantly more reads from the formalin-preserved specimens (mean =  
265 54.6%) than from the ethanol-preserved specimens (mean = 16.7%) (T-test;  $p < 0.01$ ).  
266 Following de-duplication, the mean percent of mapped reads remaining was 44% and 59% for

267 the dsBEST and ss2 HA libraries, respectively. Across all specimens extracted using the HA  
268 method, we observed no significant differences between library preparation methods in any of  
269 the three alignment quality indicators (paired T-tests). Therefore, we conducted further  
270 comparison of the effect of specimen quality on alignment success taking the mean of each  
271 alignment quality indicator from the two HA library preps.

272 HA extraction of one of three ethanol-preserved specimens (*P. carbo*) and three of nine  
273 formalin-preserved specimens (*C. porosus*, *T. guttata* and *O. anatinus*) produced < 1% aligned  
274 reads (Table 2), indicating equal rates of very poor sequencing success with ethanol- and  
275 formalin-preserved tissues. Excluding the specimens with < 1% aligned reads, the ethanol-  
276 preserved specimens produced a significantly higher percentage of aligned reads (T-test;  $p <$   
277 0.01). Two of the three ethanol-preserved specimens (*A. audax* and *P. cinereus*) produced >  
278 60% aligned reads while the remaining six formalin-preserved specimens (*R. marina*, *M.*  
279 *eugenii*, *M. undulatus*, *Pogona minima*, *Pogona vitticeps* and *Falco cenchroides*) produced  
280 between 5% and 21% aligned reads (Table 2). Excluding the specimens with < 1% aligned  
281 reads, the mean insert length was significantly longer for the ethanol-preserved specimens  
282 (mean = 76 bp) compared to the formalin-preserved specimens (mean = 59 bp) (T-test;  $p <$   
283 0.0001). MRM was also significantly higher for the ethanol-preserved specimens (mean =  
284 2,560) compared to the formalin-preserved specimens (mean = 43) (T-test:  $p < 0.01$ ).

285 The percentage of reads aligned increased with preservation media pH ( $R = 0.44$ ; Figure 3A),  
286 decreased with preservation media [F] ( $R = -0.53$ ; Figure 3B) and decreased with specimen  
287 age ( $R = -0.46$ ; Figure 3C), although these correlations were not statistically significant. The  
288 percentage of aligned reads was significantly higher in specimens sampled with liver than those  
289 sampled with muscle and skin (T-test;  $p < 0.05$ ; Figure 3D). Of the specimens yielding poor  
290 sequencing success (< 1% reads aligned), all but *C. porosus* were sampled with either muscle

291 or skin as liver was not present. The only specimen sampled with a tissue other than liver to  
292 yield a percent of reads aligned  $> 1\%$  was the ethanol-preserved *P. cinereus*.

### 293 **Genome sequencing coverage**

294 Nuclear genome coverage ( $C_{\text{nuc}}$ ) of the deduplicated alignments was  $< 1X$  for the majority of  
295 libraries. Since raw read yield was highly variable,  $C_{\text{nuc}}$  is not an appropriate measure with  
296 which to compare the extraction or library preparation methods. However, it is noteworthy that  
297 we achieved  $C_{\text{nuc}} > 1X$  for two of the ethanol-preserved specimens and three of formalin-  
298 preserved specimens. Combining all libraries for a given specimen, we achieved a total of 5.4X  
299 and 11.3X  $C_{\text{nuc}}$  for the ethanol-preserved *P. cinereus* and *A. audax* specimens, respectively  
300 (Table 2). Likewise, we achieved a total of 2.1X, 3.1X and 4.4X  $C_{\text{nuc}}$  for the formalin-preserved  
301 *P. vitticeps*, *M. undulatus* and *R. marina* specimens, respectively (Table 2). To estimate the  
302 potential for improving  $C_{\text{nuc}}$  through re-sequencing of the prepared libraries, we calculated  
303 potential genomic coverage ( $C_{\text{pot}}$ ) (Table 2). Combining all libraries for a given specimen,  $C_{\text{pot}}$   
304 exceeded 20X for the *R. marina* and *M. undulatus* and exceeded 75X for the *P. cinereus* and  
305 *A. audax*. Focussing on the mitochondrial genome, the proportion of sites with 30X or higher  
306 coverage ( $C_{\text{mt}}$ ) was nearly complete ( $> 0.9$ ) for all three ethanol-preserved specimens (Table  
307 2).  $C_{\text{mt}}$  for the formalin-preserved *M. undulatus* (0.94) was comparable to that of the ethanol-  
308 preserved specimens.  $C_{\text{mt}}$  was moderate to high ( $> 0.5$ ) for five of the formalin-preserved  
309 specimens (Table 2). Only the *C. porosus*, *T. guttata*, *F. cenchroides* and *O. anatinus* yielded  
310 very poor  $C_{\text{mt}}$  ( $< 0.15$ ).

### 311 **Read length periodicity**

312 From the aligned insert lengths estimated with Picard, we plotted the frequency of reads  
313 between 50 and 100 bp (Figure 4). This plot revealed a pattern of read length periodicity in  
314 several specimens, notably those that resulted in higher mapping success. We observed  
315 prominent periodicity of approximately 10.1 bp in the *R. marina* specimen extracted with the

316 proK-PC method. While less pronounced, we observed read length periodicity of  
317 approximately 10.8 bp in the HA extractions of *R. marina*, *P. vitticeps*, *P. minima*, *F.*  
318 *cenchroides*, *A. audax* and *P. cinereus*. The pattern of periodicity was observed in both the  
319 dsBEST and ss2 libraries, however, it was slightly more pronounced in the dsBEST libraries.

## 320 **Discussion**

321 In this study, we present evidence challenging the common perception that formalin-preserved  
322 museum specimens are devoid of accessible DNA. Processed with a tailored molecular and  
323 bioinformatic workflow, formalin-preserved specimens had an overall sequencing success rate  
324 equivalent to ethanol-preserved specimens, albeit with recovery of a lower percentage of  
325 sequence reads mapping to the reference genome. Contrary to popular belief, we found  
326 genome-wide nuclear data is retrievable from some formalin-preserved museum specimens,  
327 even with a moderate investment of sequencing effort (with 30% of formalin-preserved  
328 specimens, we achieved > 2X nuclear genome coverage from 300-500 million raw reads). We  
329 also show reconstruction of large sections of the mitochondrial genome is possible even in poor  
330 quality specimens where limited nuclear data were recovered (with 55% of formalin-preserved  
331 specimens, we achieved > 30X coverage of more than 50% of the mitochondrial genome).  
332 Investigating specimens covering a range of preservation quality, we also developed a decision-  
333 making framework to improve sequencing success rate and prioritize suitable specimens. Our  
334 findings support a considered and targeted sequencing approach that transforms thousands of  
335 spirit collection specimens into a new molecular resource. Improved access to genomic data  
336 held in these specimens has the potential to inform research into the mechanisms driving  
337 adaptation, evolution, speciation and extinction.



338 **Hot alkaline lysis effectively recovers gDNA from formalin-preserved archival tissues**  
339 **suitable for next generation sequencing.**

340 Originally developed for DNA extraction from FFPE sections, the HA method relies on high  
341 heat (120°C) under alkaline conditions (pH = 13) to break strong inter- and intramolecular  
342 cross links and utilizes organic extraction to maximize capture of fragmented gDNA from  
343 formalin-preserved tissues (50–52). This method has been applied to museum specimens to  
344 successfully recover sections of the mitochondrial genome in trout (53) and full mitochondrial  
345 genomes from lizards (40) and bacterial symbionts (41). Here we show the HA yields gDNA  
346 in adequate quantities for WGS from higher-quality formalin-preserved museum specimens.  
347 Coupled with library preparation methods designed to efficiently convert degraded DNA, we  
348 produced complex sequencing libraries with the potential to recover full vertebrate genomes  
349 when mapped using a strategy optimized to maximize recovery of endogenous sequence. Our  
350 results indicate that the HA method is appropriate for DNA extraction from a broad range of  
351 taxa preserved under various conditions, making it well-suited for application in both museum  
352 and pathological settings.

353 In a small-scale comparison to proK digestion with either phenol-chloroform extraction or  
354 column purification, the HA method performed superiorly for poor quality formalin-preserved  
355 specimens. We experienced equal success rates with the HA method in formalin and ethanol-  
356 preserved tissues. It is not standard practice to apply the HA method to ethanol-preserved  
357 specimens, which do not suffer from cross-linking, but we implemented it in this study to serve  
358 as a comparison to formalin-fixed tissues. Thus, while the HA method is likely unnecessarily  
359 harsh for recovery of DNA from tissues not crosslinked with formaldehyde, we propose this  
360 extraction method is suitable across a wide range of tissue qualities and preservation conditions  
361 observed in museum spirit collections. And, given that we achieved relatively high yield from  
362 the ethanol-preserved tissues, we propose that the HA method is appropriate in cases where

363 contact with formalin cannot be determined. We caution; however, the HA method's success  
364 may be limited to DNA-rich tissues such as liver. Our HA extractions of formalin-preserved  
365 muscle and ethanol-preserved skin tissue failed to yield adequate gDNA for sequencing, while  
366 our HA extraction of ethanol-preserved muscle tissue was less successful than our extraction  
367 of ethanol-preserved liver tissue. HA extraction has been previously observed to perform  
368 poorly compared to cetyltrimethylammonium bromide (CTAB) protocols on formalin-  
369 preserved mammalian heart tissue (54). We also note that, preservation conditions being equal,  
370 DNA yield may differ between taxonomic groups due to factors such as blood cell nucleation.  
371 Due to low sample size, we were not able to test if the lack of nucleated red blood cells in  
372 mammal tissues impacted DNA yield.

### 373 **aDNA library preparation methods effectively capture DNA extracted from formalin-** 374 **preserved archival tissues**

375 DNA degradation in museum specimens is a significant challenge to genome sequencing. To  
376 improve our conversion of degraded DNA from formalin-preserved tissues into high quality  
377 library molecules, we utilized two library preparation methods developed specifically for  
378 degraded aDNA templates. We tested the ss2 (46) and dsBEST (47) methods on DNA extracted  
379 from both ethanol and formalin-preserved archival tissues. Sequence quality was significantly  
380 higher for libraries prepared using the ss2 method compared to the dsBEST protocol. However,  
381 this quality difference did not result in significantly lower rates of read alignment or reduced  
382 mapped insert length for the dsBEST libraries. While we did not see differences in  
383 contamination rates between the two methods, an advantage of the dsBEST method is its  
384 reliance on fewer tube transfers and additions of solution, thus reducing opportunities to lose  
385 DNA and introduce contaminants. The ss2 and dsBEST methods performed similarly on all  
386 twelve of our archival templates, indicating both are well-suited to prepare libraries from DNA  
387 extracted from ethanol and formalin-preserved tissues. Alternative library preparation methods

388 developed specifically for degraded DNA may prove equally effective. To maximize  
389 conversion of fragmented archival DNA template, we advise using a library preparation  
390 method designed to capture small fragments whilst minimising contamination risk. Overall, we  
391 observed samples with very low DNA yield (< 200 ng from 50 mg of tissue) did not produce  
392 libraries with high rates of mapping success. Thus, as a cost-saving measure, we advise  
393 quantifying DNA templates prior to library preparation and focussing sequencing effort on  
394 higher yielding samples.

395 **High alignment rates of fragmented DNA are achieved through exhaustive match**  
396 **searching**

397 Removal of adapter sequence and low-quality bases via read-trimming is a standard pre-  
398 processing procedure conducted on raw sequencing reads prior to mapping. In the context of  
399 libraries prepared from highly degraded templates, filtering and trimming can reduce the  
400 dataset substantially. For example, pre-processing of the library prepared from a formalin-  
401 preserved *Anolis* lizard reduced the dataset to 13.5% of the raw data (40). Although filtering  
402 and trimming are effective at removing PCR duplicates and erroneous bases introduced through  
403 library preparation and sequencing, quality control parameters should be optimized to avoid  
404 removing informative endogenous sequence, particularly with data derived from highly  
405 fragmented low-input templates. Compared to DNA extractions from fresh tissue, our  
406 extractions from formalin-preserved specimens were highly fragmented as is typical of aDNA  
407 sources (55). We opted to trial a computationally efficient approach that eliminates loss of  
408 endogenous sequence during pre-processing. The `kalign` function from the open source `kit4b`  
409 toolkit performs alignments of raw reads by searching for the maximum length match within  
410 the read to the reference sequence regardless of the match's position within the read. For each  
411 raw read, `kalign` performs a rapid complete exhaustive match search across the indexed  
412 reference genome. The match search is performed recursively through seed expansions

413 generated along the read length. The longest match to endogenous sequence is retrieved while  
414 satisfying the minimum length threshold of the match. Using this approach, we aligned up to  
415 21% and 67% of raw reads from formalin and ethanol-preserved tissues, respectively. These  
416 alignment rates are consistent with the degree of degradation in the DNA we extracted from  
417 spirit-preserved museum specimens being intermediate between that of fresh and truly ancient  
418 tissues. A previous application of the ss2 method yielded a maximum of 11.3% mappable reads  
419 from libraries prepared from aDNA tissue sources (25). The same study yielded 60% and 68%  
420 mappable reads from libraries prepared from horse and pig liver stored in buffered formalin for  
421 5 and 11 years, respectively (25). In comparison, our modest alignment rates may be the result  
422 of tissues of intermediate age and using a different metric of calculating the percent of mapped  
423 reads.

#### 424 **Sequencing success is strongly influenced by specimen integrity prior to fixation**

425 To explore the effects of formalin-fixation on sequencing success, we selected three specimens  
426 preserved with ethanol only and nine specimens preserved with formalin. We found no  
427 significant difference in DNA yield between the ethanol and formalin-preserved specimens and  
428 the differences we observed in DNA fragment lengths were minimal. Furthermore, we  
429 observed equal rates of very poor sequencing success within ethanol and formalin-preserved  
430 specimens, indicating preservation method is not a strict determinant of sequencing success.  
431 Older, poor-quality ethanol-preserved specimens have previously been shown to be as  
432 problematic for genomic analyses as formalin-preserved specimens (42,56). This is not to say  
433 preservation method does not impact sequencing success. Two of our ethanol-preserved  
434 specimens (*P. cinereus* and *A. audax*) had much higher mapping rates (60% and 67% reads  
435 aligned, respectively) than even our most successful formalin-preserved specimens (*R. marina*,  
436 produced 21% reads aligned with the HA method). Our findings indicate WGS of formalin-  
437 preserved museum specimens is possible using HA extraction paired with a library preparation

438 optimized for conversion of degraded DNA. However, as with all potential DNA sources, the  
439 overall integrity of the tissue will ultimately determine sequencing success.

440 The specimens with poor sequencing success (< 1% reads aligned) were largely older, their  
441 preservation media had lower pH and higher [F] and they were sampled with a tissue other than  
442 liver. On the contrary, the specimens with better sequencing success were preserved more  
443 recently, their preservation media had neutral pH and lower [F] and the tissue sampled was  
444 liver. We calculated the correlation between specimen quality measures ([F], pH, age and tissue  
445 type) and both DNA yield and mapping success. Tissue type was the only quality measure  
446 significantly associated with lower DNA yield, with liver yielding significantly more DNA  
447 than either muscle or skin. Our higher success with liver is consistent with findings of a  
448 previous study comparing sequencing success from liver, muscle and tail-tip in a formalin-  
449 preserved *Anolis* lizard (40). However, in that study, the tissues were extracted using different  
450 methods and thus it could not be determined if success was driven by tissue type or extraction  
451 method.

452 Post-mortem DNA degradation occurs more rapidly in liver relative to other bodily tissues  
453 including skeletal muscle, heart and brain (57,58). In the museum curatorial setting, specimens  
454 undergo varying degrees of post-mortem decay prior to fixation. As is the case for most  
455 museum specimens, the length of the post-mortem interval (PMI) was not recorded for the  
456 specimens used in this study. Given expected rapid decay of the viscera, we used the visual  
457 appearance of the gut contents as a reasonable proxy for the length of the PMI. The four  
458 specimens used in this study that lacked liver tissue were visibly more degraded than those  
459 with intact liver tissue (Supplementary Figure 2). In the case of the *P. cinereus*, *P. carbo* and  
460 *O. anatinus*, the complete absence of viscera indicated the internal organs were likely well-  
461 degraded and discarded prior to fixation. For specimens preserved after a long PMI, DNA  
462 integrity throughout the carcass would be lower than in specimens preserved after a short PMI.

463 Therefore, we conclude that the higher yield from specimens sampled with liver is a reflection  
464 of overall specimen quality and DNA damage occurring post-mortem but prior to fixation.

### 465 **Re-thinking formalin damage**

466 Formalin-preserved museum specimens have long been considered intractable sources of  
467 gDNA. Encouragingly, we found specimen contact with formaldehyde does not prohibit DNA  
468 sequencing if tissue decomposition occurring prior to fixation is minimized. With appropriate  
469 sample vetting (Figure 5), HA extraction and DNA library preparation optimized for degraded  
470 DNA, historical genomic data may be extracted from many formalin-preserved specimens.  
471 These data will not be of similar quality to those recovered from fresh or ethanol-preserved  
472 tissues. However, higher sequencing volume and borrowing of analytical methods from the  
473 field of aDNA may facilitate reconstruction of historical genomes from formalin-preserved  
474 tissues. We found evidence that DNA damage in formalin-preserved specimens shares  
475 characteristics with that of aDNA. In addition to capturing shorter fragments with low mapping  
476 rates, we observed a pattern of read length periodicity of approximately 10 bp. This is  
477 consistent with observations in aDNA specimens (59) and is an interval that coincides with the  
478 length of a turn of the DNA helix. Pederson et al (2014) attributed the 10 bp read periodicity  
479 in specimens greater than 4,000 years old to protection of the DNA by nucleosomes  
480 preferentially positioned at 10 bp intervals. We observed a striking periodicity pattern  
481 averaging 10.8 bp in HA extracted samples and 10.1bp in the proK-PC samples. The shorter  
482 periodicity in the proK treated samples may be due to reduced protection of the ends of DNA  
483 fragments by digestion of the nucleosomes during extraction. We did not observe a signal of  
484 nucleosome occupancy in read depth or in enrichment of fragments of nucleosome length (147  
485 bp) as did Pederson et al., perhaps because we sequenced shorter fragments to comparatively  
486 low depth. However, the appearance of 10 bp periodicity suggests it may be possible to infer

487 nucleosome occupancy from patterns of DNA degradation observed in formalin-preserved  
488 specimens if higher coverage is achieved.

### 489 **Managing expectations**

490 We have shown WGS of formalin-preserved museum specimens is feasible and success can be  
491 improved through specimen quality vetting. We stress; however, measures of specimen quality  
492 are imperfect and the key parameters may vary between and within museum collections.  
493 Modern collection institutions aim to limit light exposure and temperature variation within their  
494 spirit vaults. With older specimens, the likelihood they have been exposed to undocumented  
495 DNA-degrading conditions increases. We found the age of the specimen was not strongly  
496 predictive of sequencing success, however, we did not sample specimens collected prior to the  
497 1960s. This warrants further investigation into the extent to which intact DNA can be extracted  
498 from much older formalin-preserved specimens.

499 While preservation media pH and [F] were not predictive of sequencing success in our  
500 specimens, we note these measures do not always accurately reflect preservation condition.  
501 Most institutions periodically top up the specimen jars in their spirit vaults to replace ethanol  
502 lost through evaporation. In some cases, the preservation media is replaced entirely. Thus,  
503 media pH and [F] values at the time of sampling for sequencing may not reflect preservation  
504 and long-term storage conditions. With additional sampling of older and more varied  
505 specimens, it may be possible to establish clear correlates of sequencing success associated  
506 with pH and [F].

507 Both researchers and museums would benefit from an improved set of guidelines for strategic  
508 decision making based on independent quality metrics rather than qualitative *ad hoc*  
509 assessments. This will empower researchers to most effectively deploy their sequencing  
510 budgets and support museums in deciding when to grant requests for destructive sampling. A

511 cost-benefit analysis should be conducted prior to genomic sequencing of museum specimens.  
512 From the perspective of the museum, destructive sampling should be avoided if the specimen  
513 is unlikely to yield sufficient DNA to achieve a project's aims. From the perspective of the  
514 researcher, sequencing of high-quality specimens should be prioritized to generate high-quality  
515 data. To assist in making these assessments, we provide a decision-making tree (Figure 5) for  
516 use by both curators and researchers to determine which specimens are likely to be appropriate  
517 for genomic analyses.

518 Ultimately, museum curators decide if the potential benefit of sequencing outweighs the  
519 damage to the specimen through destructive sampling. Once sampling and DNA extraction has  
520 been completed, the decision to proceed with library preparation and sequencing can be made  
521 on the basis of DNA yield. We found specimens with high DNA yield ( $> 1,500$  ng/50 mg  
522 tissue) produced a high percentage ( $> 20\%$ ) of mappable reads while specimens with low DNA  
523 yield ( $< 200$  ng/50 mg tissue) produced virtually no mappable reads. While specimens yielding  
524 between 200–1,500 ng of DNA per 50 mg tissue produced relatively low genomic coverage,  
525 they did produce high coverage of the mitochondrial genome. Thus, reconstruction of historical  
526 mitochondrial haplotypes may be possible from specimens yielding low quantities of DNA.

527 When nuclear data is required, high-volume sequencing should be reserved for high-quality  
528 specimens. Generally speaking, most research projects aim to sequence a small number of  
529 museum specimens with which to provide a base-line for comparison to contemporary  
530 specimens. In light of the limited availability of historical specimens in collections, it is often  
531 reasonable and feasible to allocate a relatively large budget to conduct deep sequencing of a  
532 small number of specimens.



## 533 **Conclusions**

534 Our results demonstrate formalin-fixation is not a complete barrier to WGS in museum  
535 specimens. While success is not a guarantee, the use of HA lysis for DNA extraction  
536 followed by an appropriate sequencing library preparation optimized for degraded DNA can  
537 produce libraries of sufficient complexity for genomic analyses. When selecting specimens  
538 for sequencing, our results indicate those with poor gut integrity are least likely to yield  
539 sufficient DNA for sequencing.

## 540 **Methods**

### 541 **Preservation media condition survey**

542 We conducted an unbiased survey of the ANWC spirit vault to measure variation in  
543 preservation characteristics that can be sampled without disturbing the specimen. We randomly  
544 selected 149 specimen jars spanning a range of taxonomic groups and ages, and removed a 25  
545 mL aliquot of preservation media. We measured pH using an Orion™ Versa Star Pro™  
546 benchtop pH meter (*Thermo Scientific*) and [F] using MQuant® test strips (*Merck*). Where [F]  
547 was at the upper detection limit of the test strips, we diluted the aliquot 1:10 with ultrapure  
548 water and remeasured, extrapolating the neat concentration of the media by multiplying the  
549 measurement by the dilution factor.

### 550 **Specimen selection**

551 To select specimens for genomic sequencing, we first identified those with a publicly available  
552 whole-genome reference for the specimen species or closely related species. Of these  
553 specimens, we selected 12 representing a range of taxonomic groups, preservation conditions  
554 and ages and sampled 50 mg of tissue. We sampled liver tissue when it was available. Muscle  
555 was sampled from an ethanol-preserved *P. cinereus* specimen and from formalin-preserved *T.*  
556 *guttata* and *O. anatinus* specimens. Skin was sampled from an ethanol-preserved *P. carbo*. All

557 specimens sampled with liver were preserved as whole animals whereas substantial portions of  
558 the body were absent from those specimens sampled with muscle or skin (Supplementary  
559 Figure 2). From the nine formalin-preserved specimens, we selected three with which to test  
560 the relative success of three DNA extraction methods. To represent “good” quality formalin-  
561 preserved specimens, we selected a cane toad (*R. marina*) preserved in 2002. Visually, this  
562 specimen appeared minimally degraded and measurements of the storage media indicated low  
563 [F] and a neutral pH. To represent “poor” quality formalin-preserved specimens, we selected a  
564 tammar wallaby (*M. eugenii*) preserved in 1989 and a saltwater crocodile (*C. porosus*)  
565 preserved in 1973. Visually, these two “poor” specimens were reasonably well-preserved,  
566 however, measurements of the storage media indicated substantial [F] in both specimen jars  
567 and mildly acidic pH in that of the wallaby.

#### 568 **Tissue preparation**

569 Prior to DNA extraction, we liquid nitrogen pulverized all dissected tissue into a fine powder  
570 using a cryoPREP® (*Covaris*) dry pulverizer (three impacts to a TT05 tissueTUBE™ on  
571 intensity setting three; 10 sec in liquid nitrogen between impacts). We then stored the  
572 pulverized tissue powder in 70% ethanol at -80°C until further processing. We re-hydrated the  
573 pulverized tissue by stepping it into 50% ethanol, 30% ethanol then TE buffer with rocking for  
574 10 min intervals. For the nine formalin-fixed tissues, we quenched excess formaldehyde by  
575 rocking for 2 hrs in 1 mL GTE buffer (100 mM glycine, 10 mM Tris-HCL, pH 8.0, 1 mM  
576 EDTA), followed by a further wash in fresh GTE for 2 hrs and a final fresh GTE wash overnight  
577 at room temperature. We removed the GTE buffer and washed with rocking in sterile water for  
578 10 min.

#### 579 **Proteinase K DNA extraction**

580 We conducted two variations on a standard proteinase K (proK) digestion. For each specimen,  
581 we digested two 50 mg (wet weight) aliquots of tissue overnight at 55°C with 30 µL of 20

582 mg/mL proteinase K in 970  $\mu$ L lysis buffer (10 mM NaCl, 20 mM Tris-HCl, pH 8.0, 1 mM  
583 EDTA, 1% SDS). We isolated DNA from the proK lysates with either (A) three extractions of  
584 phenol-chloroform followed by ethanol precipitation (proK-PC), resuspending the DNA in 30  
585  $\mu$ L TE, or (B) a QIAquick PCR purification column (*Qiagen*) (proK-col), following the  
586 manufacturer's instructions and eluting the DNA in 30  $\mu$ L TE. Alongside the museum tissues,  
587 we processed tissue-free controls. We quantified extracted dsDNA using a Qubit fluorometer  
588 and high sensitivity (HS) DNA kit (*Invitrogen*).

### 589 **Hot alkaline lysis DNA extraction**

590 For the hot alkaline lysis (HA) extractions, we heated 50 mg (wet weight) tissue aliquots to  
591 120°C for 25 min in 500  $\mu$ L of alkali buffer (0.1 M NaOH with 1% SDS, pH 13) according to  
592 methods described in (52). We purified DNA from the lysate with three phenol-chloroform  
593 extractions followed by ethanol precipitation, resuspending the DNA in 30  $\mu$ L TE. Alongside  
594 the museum tissues, we processed tissue-free controls. We quantified extracted dsDNA using  
595 a Qubit fluorometer and HS DNA kit.

### 596 **Library preparation methods**

597 To avoid cross-contamination, we prepared all sequencing libraries in the Ecogenomics and  
598 Bioinformatics Laboratory trace facility at the Australian National University following  
599 standard anti-contamination procedures. We prepared libraries from all DNA extracts and  
600 tissue-free controls using two methods developed for high efficiency conversion of fragmented  
601 aDNA; the single-stranded method v2.0 (ss2) (25) and the BEST double-stranded method  
602 (dsBEST) (26). Concurrently, we prepared DNA-free control libraries. For sequencing of Read  
603 1 in both library preparation methods, we used an adapter with the sequence 5'-  
604 AGATCGGAAGAGCACACGTCTGAACTCCAGTCAC-3'. For sequencing of Read 2, we  
605 used adapters with the sequences 5'-GGAAGAGCGTCGTGTAGGGAAAGAGTGT-3' and  
606 5'-AGATCGGAAGAGCGTCGTGTAGGGAAAGAGTGT-3' for the ss2 and dsBEST

607 methods, respectively. We removed excess adapter and primer dimer by isolating fragments  
608 between 160 bp and 400 bp from the resulting libraries using the PippinHT size-selection  
609 system (*Sage Science*). We further purified the libraries with a MinElute PCR purification kit  
610 (*Qiagen*) and quantitated the library concentrations using the LabChip GXII (*PerkinElmer*)  
611 capillary electrophoresis system. We then pooled the libraries in approximately equimolar  
612 concentrations and measured the concentration of the final pooled library using a Qubit  
613 fluorometer and HS DNA kit. The Australian Genome Research Facility sequenced the pooled  
614 library on a 150 bp paired-end S4 flow cell on the Illumina NovaSeq 6000 platform.

### 615 **Quality control of raw reads**

616 We computed quality control metrics for the raw reads using FastQC v.0.11.8 (60). Our adapter  
617 content analysis included both default Illumina adapters and our custom library adapters. To  
618 rapidly detect library contamination by non-target species' DNA, we classified the taxonomic  
619 origin of reads using Kraken2 v.2.0.9b (61). We estimated the number of unique fragments  
620 present in the raw sequence libraries with the EstimateLibraryComplexity function of PICARD  
621 v.2.9.2 (62).

### 622 **Alignment**

623 We aligned reads to reference nuclear and mitochondrial genomes obtained from the DNA Zoo  
624 Consortium (63,64) and GenBank (65) (Supplementary Table 1). Species-specific reference  
625 genomes were not available for three of the specimens. For *A. audax*, *F. cenchroides* and *P.*  
626 *minima*, we used the reference genomes of species in the same genera- *A. chrysaetos*, *F.*  
627 *perigrinus* and *P. vitticeps*, respectively (Supplementary Table 1). We hard-masked the eleven  
628 genomes with RepeatMasker v.4.1.0 (66) including our ss2 and dsBEST library adapters in the  
629 repeat database and applying the -qq option allowing 10% less sensitivity while decreasing  
630 processing time. We aligned raw reads with the kalign function of the ngskit4b tool suite  
631 v.200218 (67) with options -c25 (--minchimeric=<int>; minimum chimeric length as a

632 percentage of probe length) -l25 (--minacceptreadlen=<int>; after any end trimming only  
633 accept read for further processing if read is at least this length) -d50 (--pairminlen=<int>;  
634 accept paired end alignments with observed insert sizes of at least this) -U4 (--pemode=<int>;  
635 paired end processing mode: 4 - paired end no orphan recovery treating orphan ends as SE).  
636 We removed PCR and optical duplicates from the alignments using the MarkDuplicates  
637 function of PICARD enabling REMOVE\_DUPLICATES=TRUE. For each de-duplicated  
638 alignment, we computed a histogram of aligned insert lengths and calculated the mean aligned  
639 insert length using the CollectInsertSizeMetrics function of PICARD.

#### 640 **Genome coverage analyses**

641 We estimated nuclear genome coverage ( $C_{nuc}$ ) as the number of unique aligned reads multiplied  
642 by the mean insert length divided by unmasked genome size. To estimate how much genomic  
643 coverage could be achieved by increasing sequencing depth, we calculated the sequenced  
644 proportion of the prepared library as the number of read pairs examined divided by the  
645 estimated library size. We estimated the number of possible reads represented in the prepared  
646 library by dividing the number of actual reads aligned by the sequenced proportion of the  
647 library. We then roughly estimated the potential genomic coverage represented in the full  
648 prepared library ( $C_{pot}$ ) as:  $(\# \text{ possible reads} \times \text{mean insert length (bp)}) \div$   
649  $\text{genome size (bp)}$ . To calculate the proportion of mitochondrial genome sites with 30X or  
650 greater coverage ( $C_{mt}$ ), we executed the Samtools *depth* function (68) on SAM files for the  
651 mitochondrial contigs for each species combined across all libraries.

#### 652 **Statistical analyses**

653 We performed statistical analyses in the R environment, v.4.0.2 (69) and produced figures  
654 using the packages *ggplot2* (70) and *ggpubr* (71). To test if the residuals of data were normally  
655 distributed, we ran Shapiro-Wilk tests with the function *shapiro.test*. We conducted T-tests  
656 with the function *t.test*, analyses of variance (ANOVA) with the function *aov* and computed

657 confidence intervals using Tukey's Honest Significant Difference method (Tukey test) with the  
658 function *TukeyHSD* in the base package *stats*. We computed Pearson correlation coefficients  
659 with associated p-values with the *ggpubr* function *stat\_cor*.

660 **Figures**

661 **Figure 1. Preservation media survey results of formalin-fixed specimens in the**

662 **Australian National Wildlife Collection**

663 Residual formaldehyde concentration [F] (mg/L) is shown on a log-scale in relation to pH.

664 Individual specimens (N = 65) are colored by the time since their collection (age) and the

665 specimens selected for sequencing are indicated by species name. A linear model was used to

666 fit a regression line and standard error is shown in grey; R = Pearson's correlation coefficient.

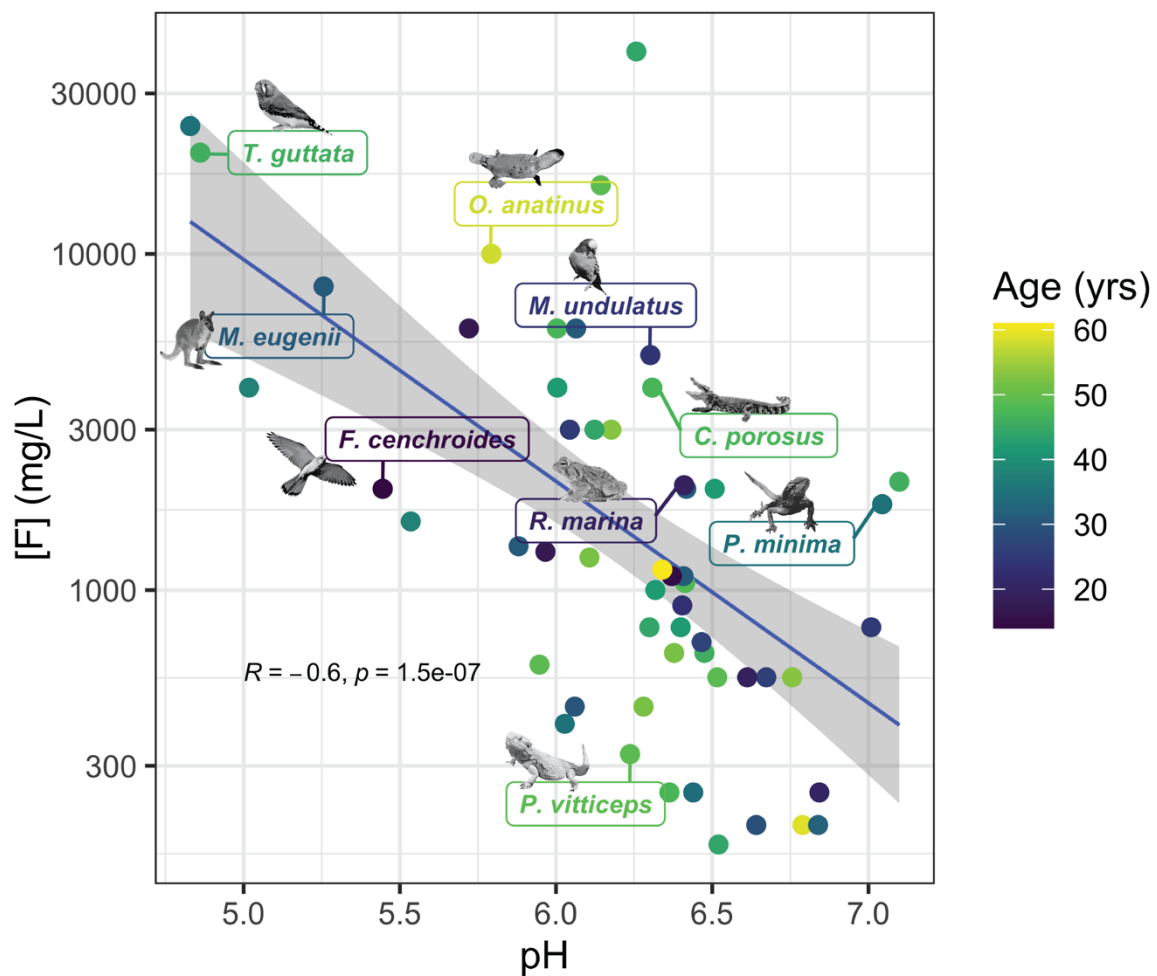

667

668

669 **Figure 2. Effectiveness of extraction and library preparation methods for *R. marina*, *C.***  
670 ***porosus* and *M. eugenii* specimens.**

671 (A) Alignment to the whole genome expressed as the percentage of reads aligning (B)  
672 Alignment to the mitochondrial genome expressed as the number of reads aligned per million  
673 raw reads (MRM). dsBEST = BEST double-stranded method (26); ss2 = single-stranded  
674 method v2.0 (25); HA = hot alkaline lysis; proK-col = proteinase K digestion followed by  
675 column purification; proK-PC = proteinase K digestion followed by phenol-chloroform  
676 extraction.

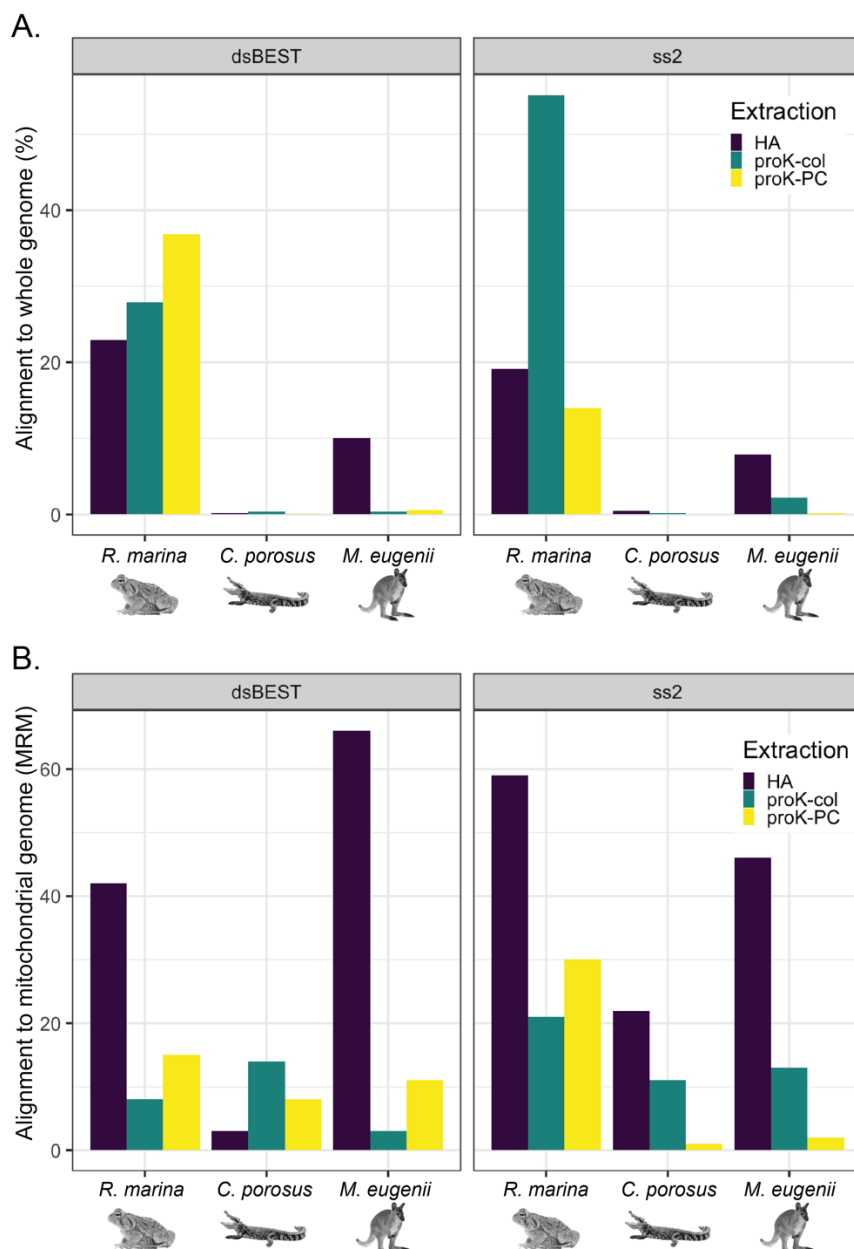

677



678 **Figure 3. Alignment results for hot alkali extracted samples**

679 The correlation between the percentage of reads aligned to the whole genome (combining  
680 both library preparations of the hot alkali extracted specimens) and (A) preservation media  
681 pH, (B) preservation media formaldehyde concentration (g/L), (C) number of years in the  
682 collection and (D) tissue sampled. In A-C, all specimens are shown colored by their fixation  
683 type and  $R$  = Pearson's correlation coefficient for the formalin-fixed specimens. In D, only  
684 the formalin-preserved specimens are plotted and individual specimens are shown with black  
685 dots, \* =  $p < 0.05$ .

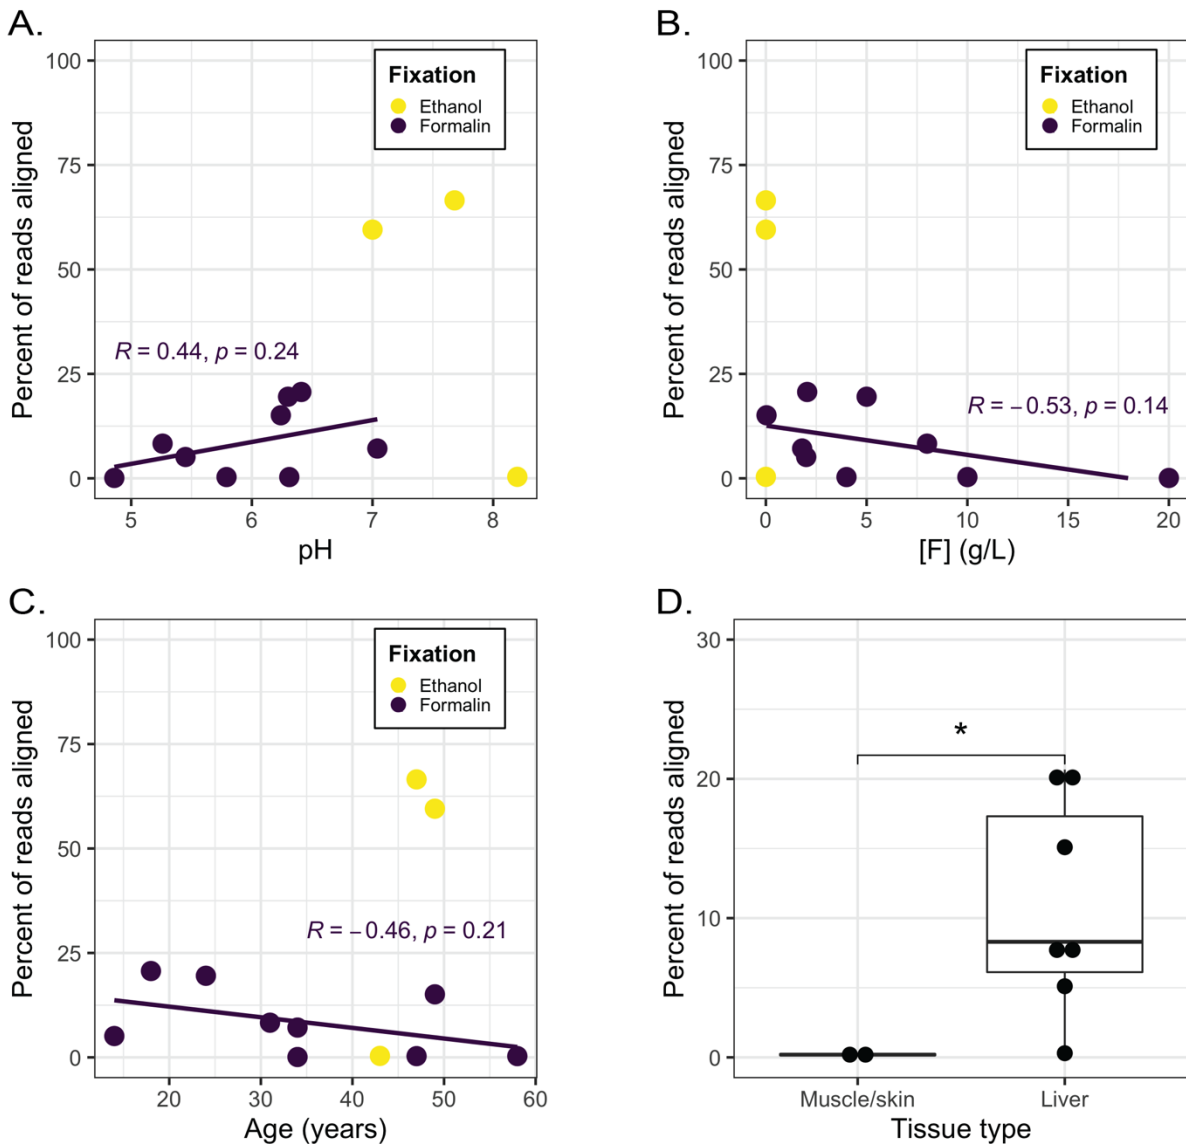

686

687 **Figure 4. Libraries with read periodicity**

688 The frequency of insert lengths, in bp, estimated from the mapped dsBEST libraries is shown  
689 for six preserved specimens. Read periodicity in the *R. marina* libraries from the proteinase K  
690 with phenol-chloroform (proK-PC) extractions averages 10.1 bp while periodicity in libraries  
691 from the hot alkali extractions of six specimens averages 10.8 bp.

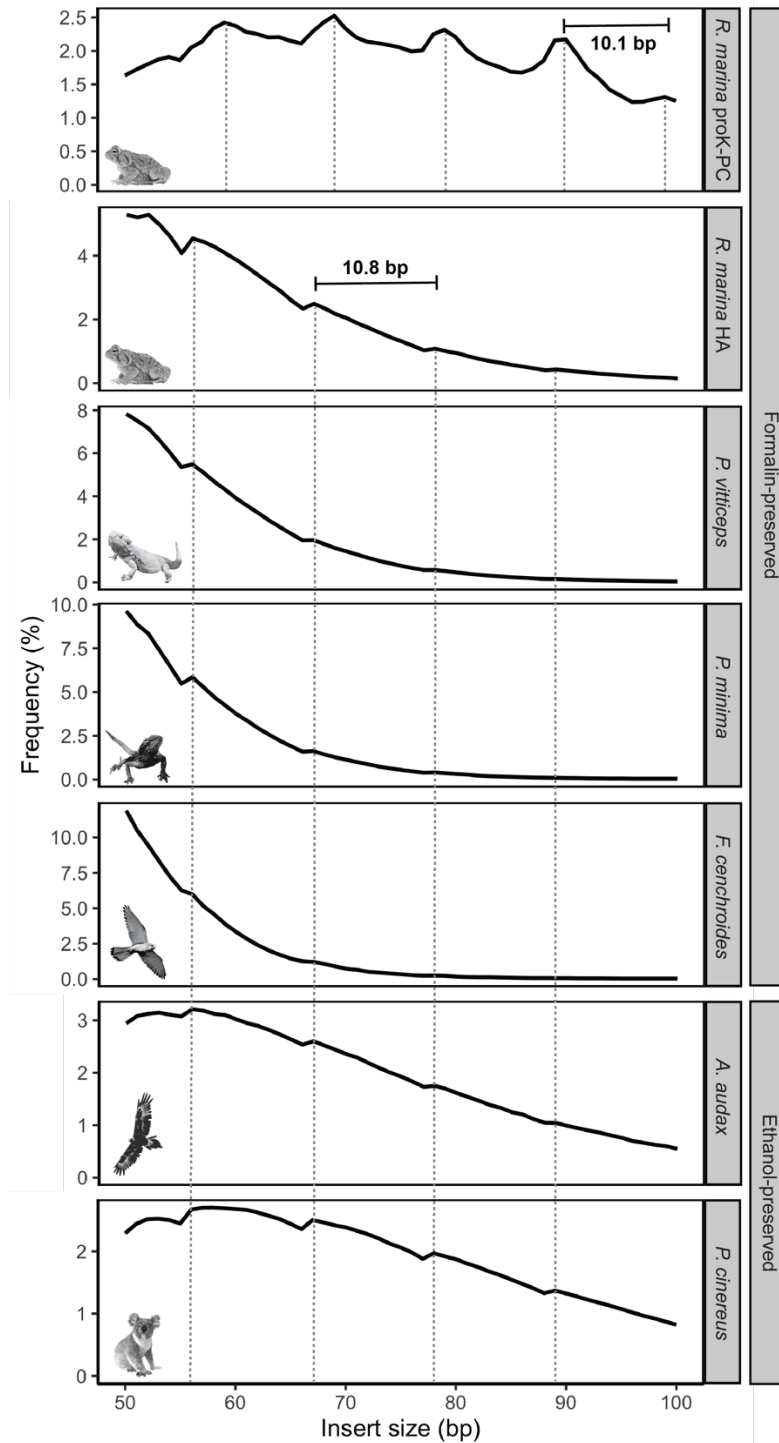

692

693 **Figure 5. Decision-making tree for a priori estimation of likely sequencing success in**  
 694 **spirit-preserved museum specimens.**

695 Green ticks indicate the specimen is well-suited the sequencing application and there is a high  
 696 likelihood of success. Black question marks indicate the specimen is marginal for the  
 697 sequencing application and there is high variation in the likelihood of success. Red crosses  
 698 indicate the specimen is not well-suited for the sequencing application and there is a low  
 699 likelihood of success.

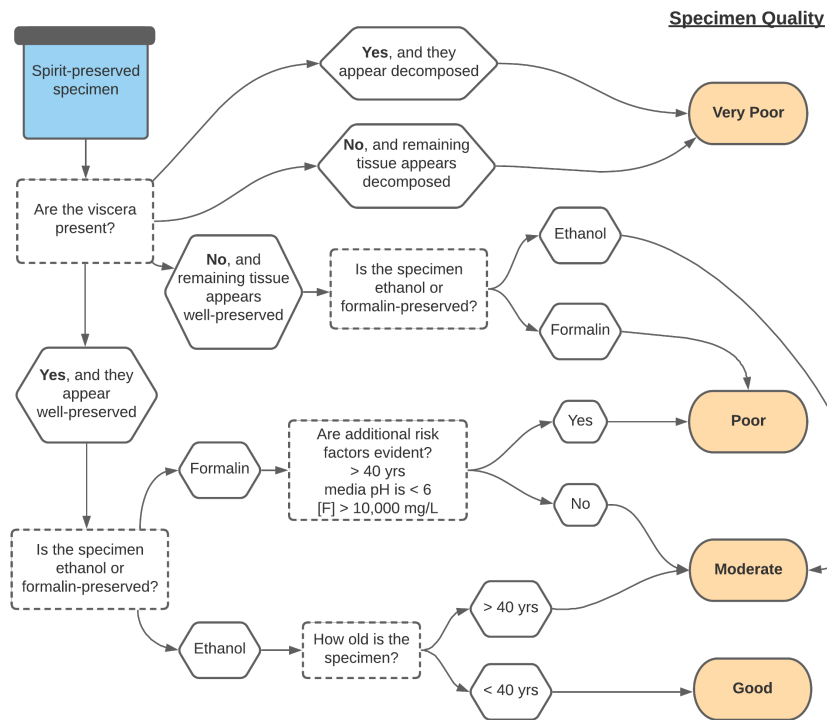

|                 |                                | Specimen quality |          |      |           |
|-----------------|--------------------------------|------------------|----------|------|-----------|
|                 |                                | Good             | Moderate | Poor | Very Poor |
| Genome coverage | Amplicon sequencing            | ✓                | ✓        | ✓    | ?         |
|                 | Capture-based genotyping       | ✓                | ✓        | ?    | ✗         |
|                 | Whole mitochondrial sequencing | ✓                | ✓        | ?    | ✗         |
|                 | Whole genome sequencing        | ✓                | ?        | ✗    | ✗         |

700

701 **Declarations**

702 **Ethics approval and consent to participate**

703 Not applicable.

704 **Consent for publication**

705 Not applicable.

706 **Availability of data and materials**

707 The sequencing data generated and analysed in this study are archived in the [CSIRO Data](#)

708 [Access Portal](#). Correspondence and requests for materials should be addressed to CEH

709 (clare.holleley@csiro.au)

710 **Competing interests**

711 The authors declare they have no competing interests.

712 **Funding**

713 Funding for this study was provided by the Environomics CSIRO Future Science Platform

714 (grants R-10011 and R-14486) awarded to CEH.

715 **Authors' contributions**

716 This study was conceived by CEH. Experiments were designed by CEH, MRA and AG and

717 conducted by MRA and AG. Data analysis was conducted by EEH, JS, MRA and AG and

718 advised by DMG and CEH. All authors contributed to the writing and editing of the manuscript.

719 **Acknowledgements**

720 We thank Olly Berry and Andrew Young for their leadership within the Environomics Future

721 Science Platform. We thank the director of the [Australian National Wildlife Collection](#), Leo

722 Joseph, and the ANWC staff (specifically, Margaret Cawsey, Alex Drew, Tonya Haff, Dave

723 Spratt and Chris Wilson) for their contributions of curatorial expertise, metadata management

724 and sampling assistance. We thank Kerensa McElroy for her assistance and guidance in data

725 management. We thank Ondrej Hlinka and CSIRO IM&T Client Services for their assistance  
726 in utilising the CSIRO Pearcey supercomputing system. We thank Niccy Aitkin for her  
727 guidance in utilising the Australian National University's Ecogenomics and Bioinformatics  
728 Laboratory for library preparation. We thank the Australian Genome Research Facility for their  
729 conversations around sequencing. We thank Sharon Appleyard, Meghan Castelli, Andrew  
730 George, Peter Grewe, Michael Hope, Safia Maher, Annette McGrath, Corinna Paeper, Cheng  
731 Soon-Ong, Andrew Spriggs, Jen Taylor and Christfried Webers for their valuable comments  
732 on the study design and implementation. We would like to acknowledge the contribution of  
733 Bioplatforms Australia in the generation of data used in this publication. Bioplatforms  
734 Australia is enabled by NCRIS.

## 735 **References**

- 736 1. Shaffer HB, Fisher RN, Davidson C. The role of natural history collections in documenting  
737 species declines. *Trends Ecol Evol.* 1998;13(1):27–30.
- 738 2. Meineke EK, Davies TJ, Daru BH, Davis CC. Biological collections for understanding  
739 biodiversity in the Anthropocene. *Philos Trans R Soc Lond B Biol Sci.* 2018;  
740 doi:10.1098/rstb.2017.0386
- 741 3. Holmes MW, Hammond TT, Wogan GOU, Walsh RE, LaBarbera K, Wommack EA,  
742 Martins FM, Crawford JC, Mack KL, Bloch LM, Nachman MW. Natural history  
743 collections as windows on evolutionary processes. *Mol Ecol.* 2016;25(4):864–81.
- 744 4. Martínková N, Searle JB. Amplification success rate of DNA from museum skin  
745 collections: a case study of stoats from 18 museums. *Mol Ecol Notes.* 2006;6(4):1014–7.
- 746 5. Rawlence NJ, Wood JR, Armstrong KN, Cooper A. DNA content and distribution in  
747 ancient feathers and potential to reconstruct the plumage of extinct avian taxa. *Proc Biol*  
748 *Sci.* 2009;276(1672):3395–402.
- 749 6. Sefc KM, Payne RB, Sorenson MD. Microsatellite amplification from museum feather  
750 samples: effects of fragment size and template concentration on genotyping errors. *Auk.*  
751 2003;120(4):982–9.
- 752 7. Grealy A, Bunce M, Holleley CE. Avian mitochondrial genomes retrieved from museum  
753 eggshell. *Mol Ecol Resour.* 2019;19(4):1052–62.
- 754 8. Grealy A, Langmore NE, Joseph L, Holleley CE. Genetic barcoding of museum eggshell  
755 improves data integrity of avian biological collections. *Sci Rep.* 2021;11(1):1605.
- 756 9. Tsai WLE, Schedl ME, Maley JM, McCormack JE. More than skin and bones: comparing  
757 extraction methods and alternative sources of DNA from avian museum specimens. *Mol*  
758 *Ecol Resour.* 2020;20(5):1220–7.
- 759 10. McElroy K, Beattie K, Symonds MRE, Joseph L. Mitogenomic and nuclear diversity in  
760 the Mulga Parrot of the Australian arid zone: cryptic subspecies and tests for selection.  
761 *Emu - Austral Ornithology.* 2018;118(1):22–35.
- 762 11. Morgan CC, Creevey CJ, O’Connell MJ. Mitochondrial data are not suitable for resolving  
763 placental mammal phylogeny. *Mamm Genome.* 2014;25(11–12):636–47.
- 764 12. Hackett SJ, Kimball RT, Reddy S, Bowie RCK, Braun EL, Braun MJ, et al. A  
765 phylogenomic study of birds reveals their evolutionary history. *Science.*  
766 2008;320(5884):1763–8.
- 767 13. Derkarabetian S, Benavides LR. Sequence capture phylogenomics of historical ethanol-  
768 preserved museum specimens: unlocking the rest of the vault. *Mol Ecol.* 2019; doi:  
769 10.1111/1755-0998.13072.
- 770 14. Linck EB, Hanna ZR, Sellas A, Dumbacher JP. Evaluating hybridization capture with  
771 RAD probes as a tool for museum genomics with historical bird specimens. *Ecol Evol.*  
772 2017;7(13):4755–67.

- 773 15. Wood HM, González VL, Lloyd M, Coddington J, Scharff N. Next-generation museum  
774 genomics: phylogenetic relationships among palpimanoid spiders using sequence capture  
775 techniques (Araneae: Palpimanoidea). *Mol Phylogenet Evol.* 2018;127:907–18.
- 776 16. Parejo M, Wragg D, Henriques D, Charrière J-D, Estonba A. Digging into the genomic  
777 past of Swiss honey bees by whole-genome sequencing museum specimens. *Genome Biol*  
778 *Evol.* 2020;12(12):2535–51.
- 779 17. Staats M, Erkens RHJ, van de Vossenberg B, Wieringa JJ, Kraaijeveld K, Stielow B, Geml  
780 J, Richardson JE, Bakker FT. Genomic treasure troves: complete genome sequencing of  
781 herbarium and insect museum specimens. *PLoS One.* 2013;8(7):e69189.
- 782 18. Feigin CY, Newton AH, Doronina L, Schmitz J, Hipsley CA, Mitchell KJ, Gower G,  
783 Llamas B, Soubrier J, Heider TN, Menzies BR, Cooper A, O’Neill RJ, Pask AJ. Genome  
784 of the Tasmanian tiger provides insights into the evolution and demography of an extinct  
785 marsupial carnivore. *Nat Ecol Evol.* 2018;2(1):182–92.
- 786 19. Atlas of Living Australia. <https://www.ala.org.au/>. Accessed 28 January 2021.
- 787 20. Appleyard SA, Maher S, Pogonoski JP, Bent SJ, Chua X-Y, McGrath A. Assessing DNA  
788 for fish identifications from reference collections: the good, bad and ugly shed light on  
789 formalin fixation and sequencing approaches. *J Fish Biol.* 2021; doi:10.1111/jfb.14687.
- 790 21. Srinivasan M, Sedmak D, Jewell S. Effect of fixatives and tissue processing on the content  
791 and integrity of nucleic acids. *Am J Pathol.* 2002;161(6):1961–71.
- 792 22. Williams C, Ponten F, Moberg C, Soderkvist P, Uhlen M, Ponten J, Sitbon G, Lundeberg  
793 J. A high frequency of sequence alterations is due to formalin fixation of archival  
794 specimens. *Am J Pathol.* 1999;155(5):1467–71.
- 795 23. Do H, Dobrovic A. Sequence artifacts in DNA from formalin-fixed tissues: causes and  
796 strategies for minimization. *Clin Chem.* 2015;61(1):64–71.
- 797 24. Burrell AS, Disotell TR, Bergey CM. The use of museum specimens with high-throughput  
798 DNA sequencers. *J Hum Evol.* 2015;79:35–44.
- 799 25. Gansauge M-T, Gerber T, Glocke I, Korlevic P, Lippik L, Nagel S, Riehl LM, Schmidt A,  
800 Meyer M. Single-stranded DNA library preparation from highly degraded DNA using T4  
801 DNA ligase. *Nucleic Acids Res.* 2017;45(10):e79.
- 802 26. Carøe C, Gopalakrishnan S, Vinner L, Mak SST, Sinding MHS, Samaniego JA, Wales N,  
803 Sicheritz-Pontén, Gilbert MTP. Single-tube library preparation for degraded DNA.  
804 *Methods in Ecology and Evolution.* 2018;9(2):410–419.
- 805 27. Parks M, Lambert D. Impacts of low coverage depths and post-mortem DNA damage on  
806 variant calling: a simulation study. *BMC Genomics.* 2015;16:19.
- 807 28. Robbe P, Popitsch N, Knight SJL, Antoniou P, Becq J, He M, et al. Clinical whole-genome  
808 sequencing from routine formalin-fixed, paraffin-embedded specimens: pilot study for the  
809 100,000 Genomes Project. *Genet Med.* 2018; doi:10.1038/gim.2017.241.
- 810 29. Simmons JE. Fluid preservation : a comprehensive reference. Lanham: Rowman &  
811 Littlefield; 2014.

- 812 30. MacLeod ID. Washing formaldehyde from fixed spirit specimens: a mechanism for the  
813 preservation of Megamouth III. AICCM Bulletin. 2008;31(1):36–43.
- 814 31. Koshiha M, Ogawa K, Hamazaki S, Sugiyama T, Ogawa O, Kitajima T. The effect of  
815 formalin fixation on DNA and the extraction of high-molecular-weight DNA from fixed  
816 and embedded tissues. Pathol Res Pract. 1993;189(1):66–72.
- 817 32. Bär W, Kratzer A, Mächler M, Schmid W. Postmortem stability of DNA. Forensic Sci Int.  
818 1988;39(1):59–70.
- 819 33. Palmer ADN. DNA isolation and amplification from formaldehyde-fixed animal tissues  
820 rich in mucopolysaccharides, pigments, and chitin. Prep Biochem Biotechnol.  
821 2009;39(1):72–80.
- 822 34. Bibi SS, Rehman A, Minhas RA, Janjua S. Evaluation of DNA extraction method from  
823 formalin preserved skin samples of *Panthera pardus* for molecular genetic assessment.  
824 The Journal of Animal & Plant Sciences. 2015;25:1196–9.
- 825 35. Lutterschmidt WI, Cureton JC, Gaillard AR. “Quick” DNA extraction from claw  
826 clippings of fresh and formalin-fixed box turtle (*Terrapene ornata*) specimens. Herpetol  
827 Rev. 2010;41(3):313–5.
- 828 36. Scatena MP, Morielle-Versute E. Suitability of DNA extracted from archival specimens  
829 of fruit-eating bats of the genus *Artibeus* (Chiroptera, Phyllostomidae) for polymerase  
830 chain reaction and sequencing analysis. Genet Mol Biol. 2008;31(1):160–5.
- 831 37. Joshi BD, Mishra S, Singh SK, Goyal SP. An effective method for extraction and  
832 polymerase chain reaction (PCR) amplification of DNA from formalin preserved tissue  
833 samples of snow leopard. Afr J Biotechnol. 2013;12(22):3399–404.
- 834 38. Shedlock AM, Haygood MG, Pietsch TW, Bentzen P. Enhanced DNA extraction and PCR  
835 amplification of mitochondrial genes from formalin-fixed museum specimens.  
836 Biotechniques. 1997;22(3):394–400.
- 837 39. Boyle EE, Zardus JD, Chase MR, Etter RJ, Rex MA. Strategies for molecular genetic  
838 studies of preserved deep-sea macrofauna. Deep Sea Res Part I. 2004;51(10):1319–36.
- 839 40. Hykin SM, Bi K, McGuire JA. Fixing formalin: a method to recover genomic-scale DNA  
840 sequence data from formalin-fixed museum specimens using high-throughput sequencing.  
841 PLoS One. 2015;10(10):e0141579.
- 842 41. Gould AL, Fritts-Penniman A, Gaisiner A. Museum genomics illuminate the high  
843 specificity of a bioluminescent symbiosis across a genus of reef fish. Front Ecol Evol.  
844 2021; doi:10.3389/fevo.2021.630207.
- 845 42. Ruane S, Austin CC. Phylogenomics using formalin-fixed and 100+ year-old intractable  
846 natural history specimens. Mol Ecol Resour. 2017;17(5):1003–8.
- 847 43. Kehlmaier C, Zinenko O, Fritz U. The enigmatic Crimean green lizard (*Lacerta viridis*  
848 *magnifica*) is extinct but not valid: mitogenomics of a 120-year-old museum specimen  
849 reveals historical introduction. J Zool Syst Evol Res. 2020;58(1):303–7.



- 850 44. Diaz-Viloria N, Sanchez-Velasco L, Perez-Enriquez R. Inhibition of DNA amplification  
851 in marine fish larvae preserved in formalin. *J Plankton Res.* 2005;27(8):787–92.
- 852 45. Pierson TW, Kieran TJ, Clause AG, Castleberry NL. Preservation-induced morphological  
853 change in salamanders and failed DNA extraction from a decades-old museum specimen:  
854 implications for *Plethodon ainsworthi*. *J Herpetol.* 2020;54(2):137–43.
- 855 46. McGaughran A. Effects of sample age on data quality from targeted sequencing of  
856 museum specimens: what are we capturing in time? *BMC Genomics.* 2020;21(1):188.
- 857 47. Watanabe M, Hashida S, Yamamoto H, Matsubara T, Ohtsuka T, Suzawa K, Maki Y, Soh  
858 J, Asano H, Tsukuda K, Toyooka S, Miyoshi S. Estimation of age-related DNA  
859 degradation from formalin-fixed and paraffin-embedded tissue according to the extraction  
860 methods. *Exp Ther Med.* 2017;14(3):2683–8.
- 861 48. Zimmermann J, Hajibabaei M, Blackburn DC, Hanken J, Cantin E, Posfai J, Evans TC.  
862 DNA damage in preserved specimens and tissue samples: a molecular assessment. *Front*  
863 *Zool.* 2008;5:18.
- 864 49. Freedman J, van Dorp LB, Brace S. Destructive sampling natural science collections: an  
865 overview for museum professionals and researchers. *Journal of Natural Science*  
866 *Collections.* 2018;5:21–34.
- 867 50. Shi S-R, Datar R, Liu C, Wu L, Zhang Z, Cote RJ, Taylor CR. DNA extraction from  
868 archival formalin-fixed, paraffin-embedded tissues: heat-induced retrieval in alkaline  
869 solution. *Histochem Cell Biol.* 2004;122(3):211–8.
- 870 51. Shi S-R, Cote RJ, Wu L, Liu C, Datar R, Shi Y, Liu D, Lim H, Taylor CR. DNA extraction  
871 from archival formalin-fixed, paraffin-embedded tissue sections based on the antigen  
872 retrieval principle: heating under the influence of pH. *J Histochem Cytochem.*  
873 2002;50(8):1005–11.
- 874 52. Campos PF, Gilbert TMP. DNA extraction from formalin-fixed material. *Ancient DNA:*  
875 *Methods and Protocols.* 2012;840:81–5.
- 876 53. Splendiani A, Fioravanti T, Giovannotti M, Olivieri L, Ruggeri P, Nisi Cerioni P, Vanni  
877 S, Enrichetti F, Caputo Barucchi V. Museum samples could help to reconstruct the original  
878 distribution of *Salmo trutta* complex in Italy. *J Fish Biol.* 2017;90(6):2443–51.
- 879 54. Paireder S, Werner B, Bailer J, Werther W, Schmid E, Patzak B, Cichna-Markl M.  
880 Comparison of protocols for DNA extraction from long-term preserved formalin fixed  
881 tissues. *Anal Biochem.* 2013;439(2):152–60.
- 882 55. Prüfer K, Stenzel U, Hofreiter M, Pääbo S, Kelso J, Green RE. Computational challenges  
883 in the analysis of ancient DNA. *Genome Biol.* 2010;11(5):R47.
- 884 56. McGuire JA, Cotoras DD, O’Connell B, Lawalata SZS, Wang-Claypool CY, Stubbs A,  
885 Huang X, Wogan GOU, Hykin SM, Reilly SB, Bi K, Riyanto A, Arida E, Smith LL, Milne  
886 H, Streicher JW, Iskandar DT. Squeezing water from a stone: high-throughput sequencing  
887 from a 145-year old holotype resolves (barely) a cryptic species problem in flying lizards.  
888 *PeerJ.* 2018;6:e4470.

- 889 57. Johnson LA, Ferris JAJ. Analysis of postmortem DNA degradation by single-cell gel  
890 electrophoresis. *Forensic Sci Int.* 2002;126(1):43–7.
- 891 58. Itani M, Yamamoto Y, Doi Y, Miyaishi S. Quantitative analysis of DNA degradation in  
892 the dead body. *Acta Med Okayama.* 2011;65(5):299–306.
- 893 59. Pedersen JS, Valen E, Velazquez AMV, Parker BJ, Rasmussen M, Lindgreen S, Lilje B,  
894 Tobin DJ, Kelly TK, Vang S, Andersson R, Jones PA, Hoover CA, Tikhonov A,  
895 Prokhortchouk E, Rubin EM, Sandelin A, Gilbert MTP, Krogh A, Willerslev E, Orlando  
896 L. Genome-wide nucleosome map and cytosine methylation levels of an ancient human  
897 genome. *Genome Res.* 2014;24(3):454–66.
- 898 60. Andrews S. FastQC: a quality control tool for high throughput sequence data.  
899 <https://www.bioinformatics.babraham.ac.uk/projects/fastqc/>. Accessed 1 August 2019.
- 900 61. Wood DE, Lu J, Langmead B. Improved metagenomic analysis with Kraken 2. *Genome*  
901 *Biol.* 2019;20(1):257.
- 902 62. Picard. <http://broadinstitute.github.io/picard/>. Accessed 8 September 2020.
- 903 63. Dudchenko O, Batra SS, Omer AD, Nyquist SK, Hoeger M, Durand NC, Shamim MS,  
904 Machol I, Lander ES, Aiden AP, Aiden EL. De novo assembly of the *Aedes aegypti*  
905 genome using Hi-C yields chromosome-length scaffolds. *Science.* 2017;356(6333):92–5.
- 906 64. DNA Zoo. <https://www.dnazoo.org>. Accessed 7 August 2019.
- 907 65. GenBank. <https://www.ncbi.nlm.nih.gov/genbank/>. Available from the National Center  
908 for Biotechnology Information. Accessed 7 August 2019.
- 909 66. Smit AFA, Hubley R, Green P. Repeat-Masker Open-4.0. <http://www.repeatmasker.org>.  
910 Accessed 15 August 2019.
- 911 67. Stephen S. kit4b. <https://github.com/kit4b>. Accessed 16 January 2020.
- 912 68. Li H, Handsaker B, Wysoker A, Fennell T, Ruan J, Homer N, Marth G, Abecasis G,  
913 Durbin N, 1000 Genome Project Data Processing Subgroup. The sequence alignment/map  
914 format and SAMtools. *Bioinformatics.* 2009;25(16):2078–9.
- 915 69. R Core Team. R: A language and environment for statistical computing. [https://wwwR-](https://www.R-project.org/)  
916 [project.org/](https://www.R-project.org/). Accessed 19 September 2019.
- 917 70. Wickham H. ggplot2. <https://ggplot2.tidyverse.org/>. Accessed 20 November 2020.
- 918 71. Kassambara A. ggpubr. <https://github.com/kassambara/ggpubr/>. Accessed 20 November  
919 2020.
